# Supplementary material for: Time restricted feeding modifies leukocyte responsiveness and improves inflammation outcome
Source: PubMed Central journal article supplement (PMC9666763; doi:10.3389/fimmu.2022.924541), 2022-11-02
Supplement: DataSheet_1.pdf [file DataSheet_1.pdf]

## Supplementary Material

- Supplementary Figure 1.** Flow cytometric analysis of leukocyte populations in blood.
- Supplementary Figure 2.** Flow cytometric analysis of migratory factors expressed on neutrophils and monocytes.
- Supplementary Figure 3.** Flow cytometric analysis of the marginated and tissue leukocyte populations of the lung.
- Supplementary Figure 4.** Adrenal mass, serum corticosterone levels, body weight, food intake and glucose tolerance of the experimental groups.
- Supplementary Figure 5.** Body weight of the animals did not differ in arthritis experiments.
- Supplementary Figure 6.** Peripheral leukocyte counts did not differ before conditioning the animals to different feeding regimens.
- Supplementary Figure 7.** Time restricted feeding entrains the peripheral clock but does not modify the rhythm of CXCL12 and the inflammatory state of the bone marrow.
- Supplementary Figure 8.** Expression of migratory factors of neutrophils and monocytes.
- Supplementary Figure 9.** Histograms of fluorescence intensities presented in Figure 6.
- Supplementary Figure 10.** Expression of migratory factors of neutrophils and monocytes after leptin treatment.
- Supplementary Figure 11.** Effect of TRF on the abundance of neutrophils among spleen leukocytes.
- Supplementary Table 1.** Primer and probe sequences for gene expression analysis.
- Supplementary Table 2.** Antibodies and staining reagents.
- Supplementary Table 3.** Parameters of the fitted cosine curves shown in Figure 2B.
- Supplementary Table 4.** Parameters of the fitted cosine curves shown in Figure 3B and D.
- Supplementary Table 5.** Parameters of the fitted cosine curves shown in Figure 5.
- Supplementary Table 6.** Parameters of the fitted cosine curves shown in Supplementary Figure 7B.
- Supplementary Table 7.** Parameters of the cosine curves fitted to the data shown in Supplementary Figure 7C, D, F.

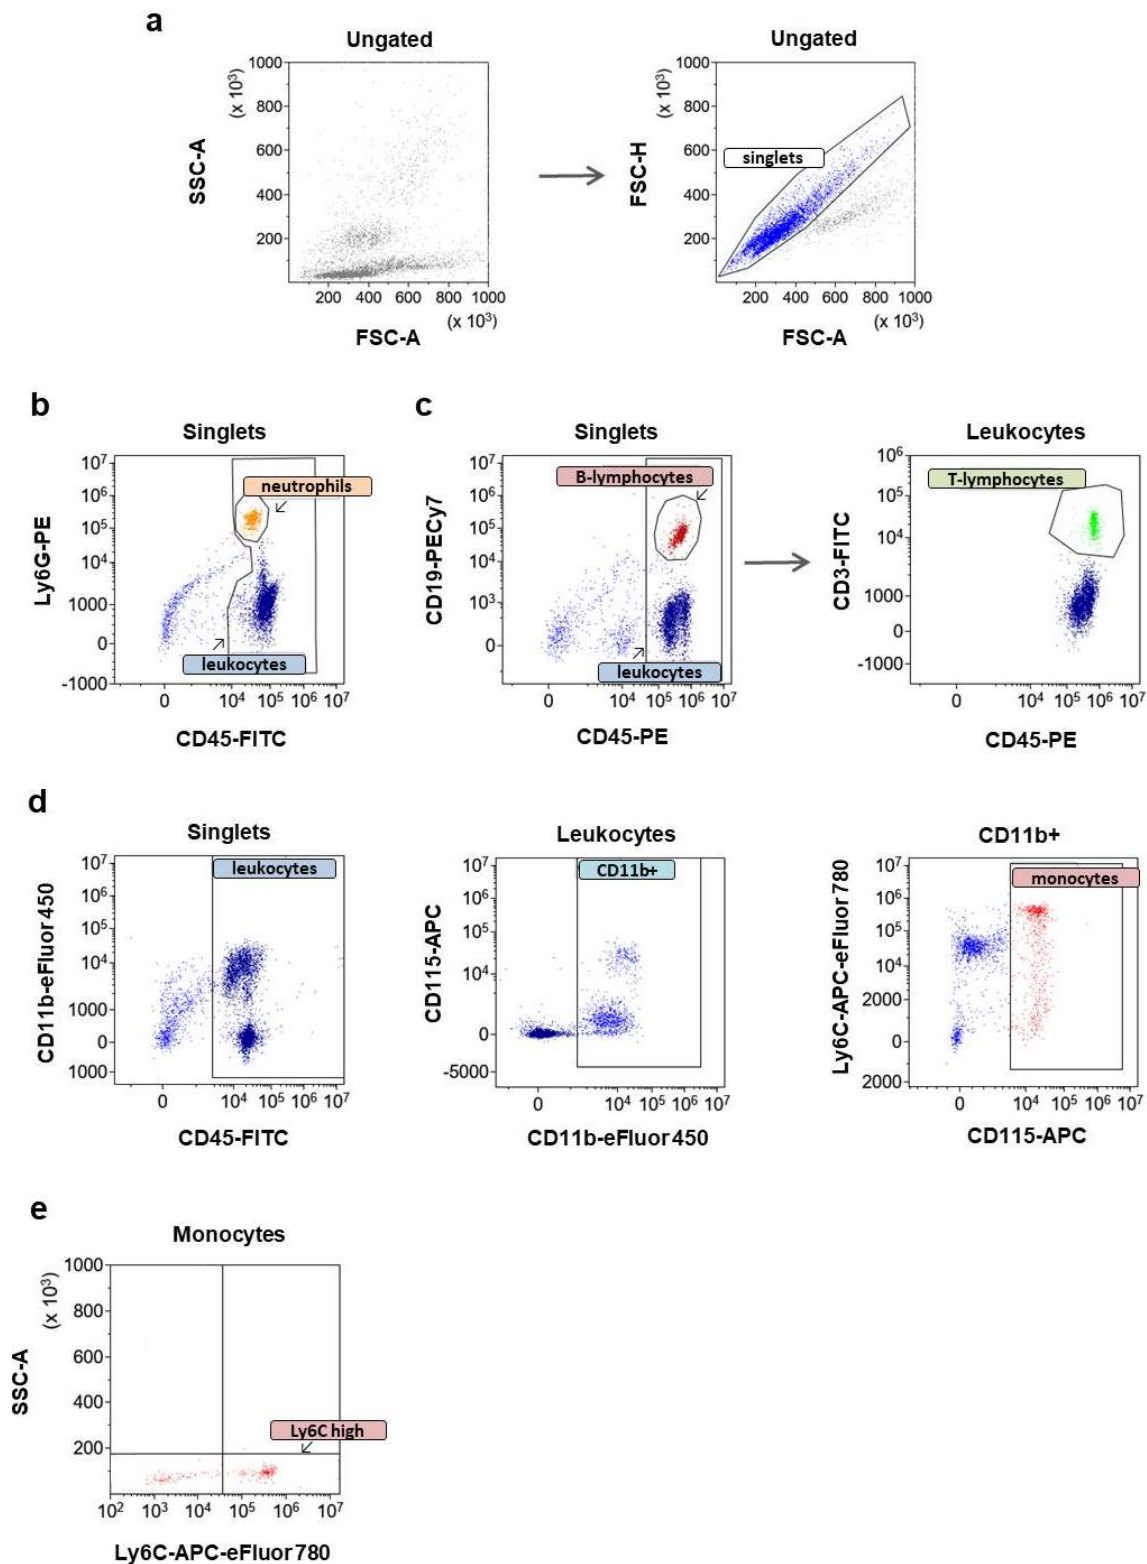

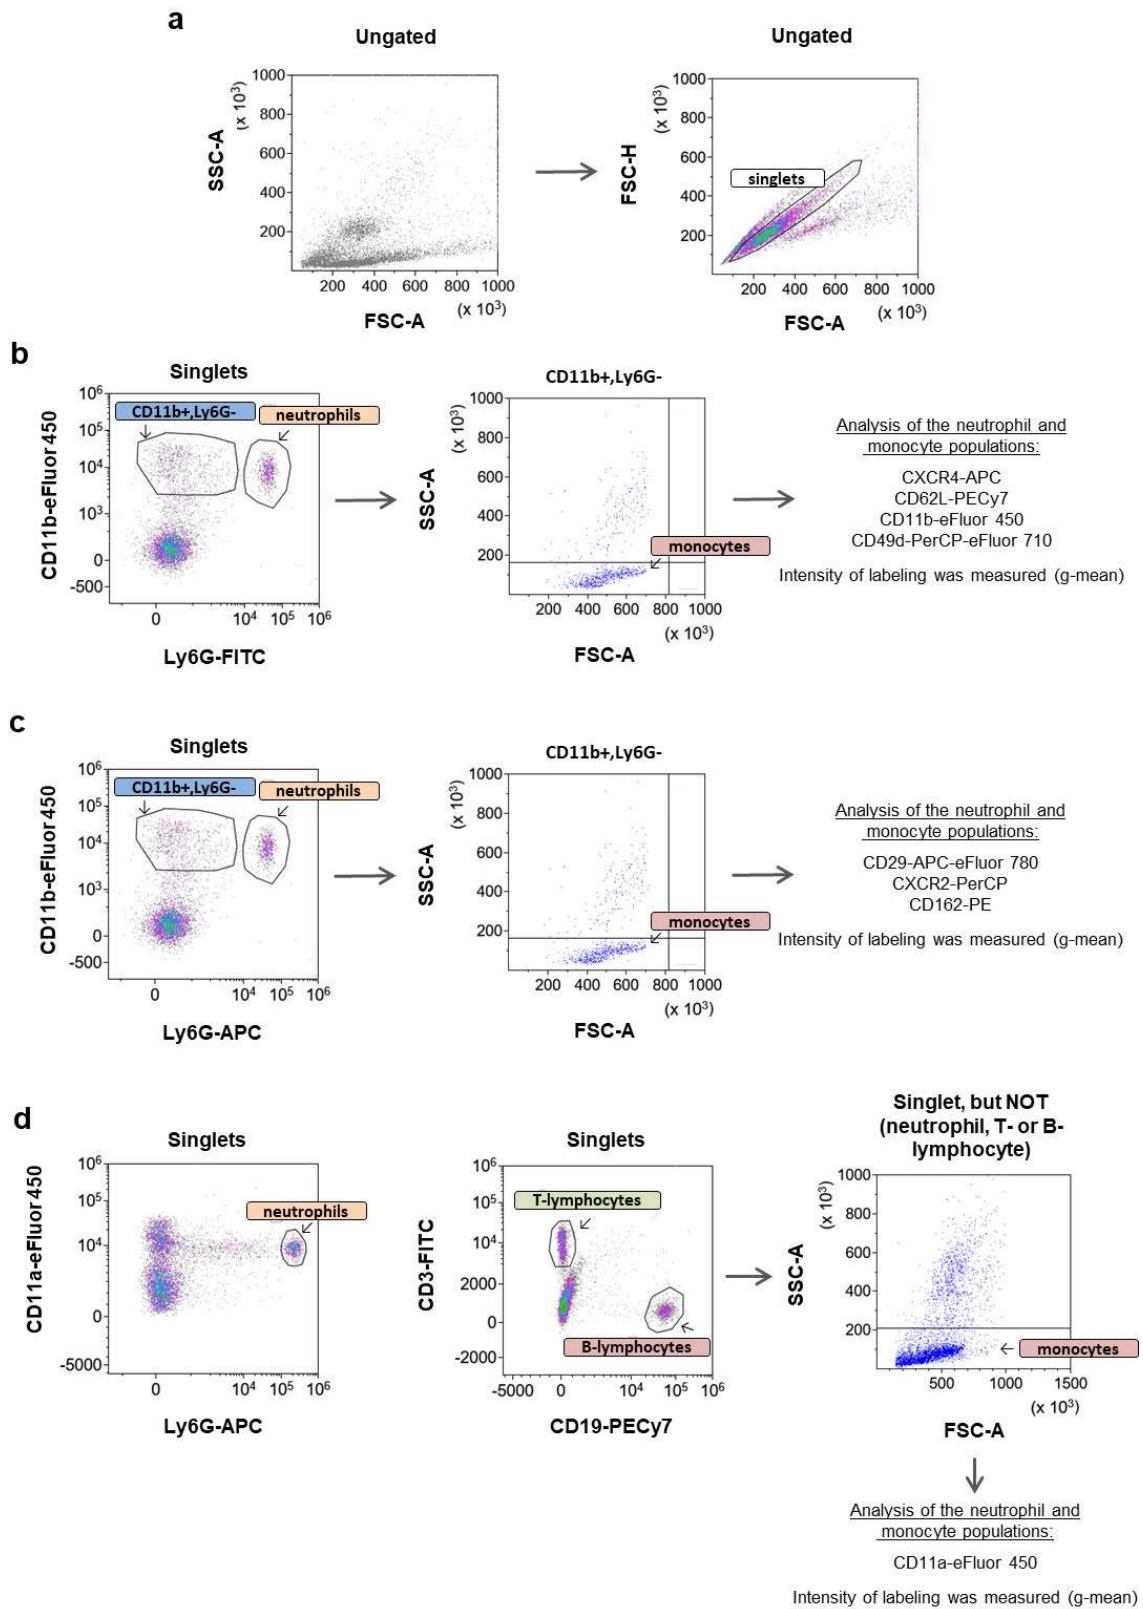

**Supplementary Figure 2. Flow cytometric analysis of migratory factors expressed on neutrophils and monocytes.** Before analysis of specific labelings, singlets were gated in all cases (A). Identification of neutrophils (Ly6G+) and monocytes (CD11b+, Ly6G-, SSC<sup>low</sup> or Ly6G-, CD3-, CD19-, SSC<sup>low</sup>) (B, C, D). Intensity of labeling signals was determined using g-mean values.

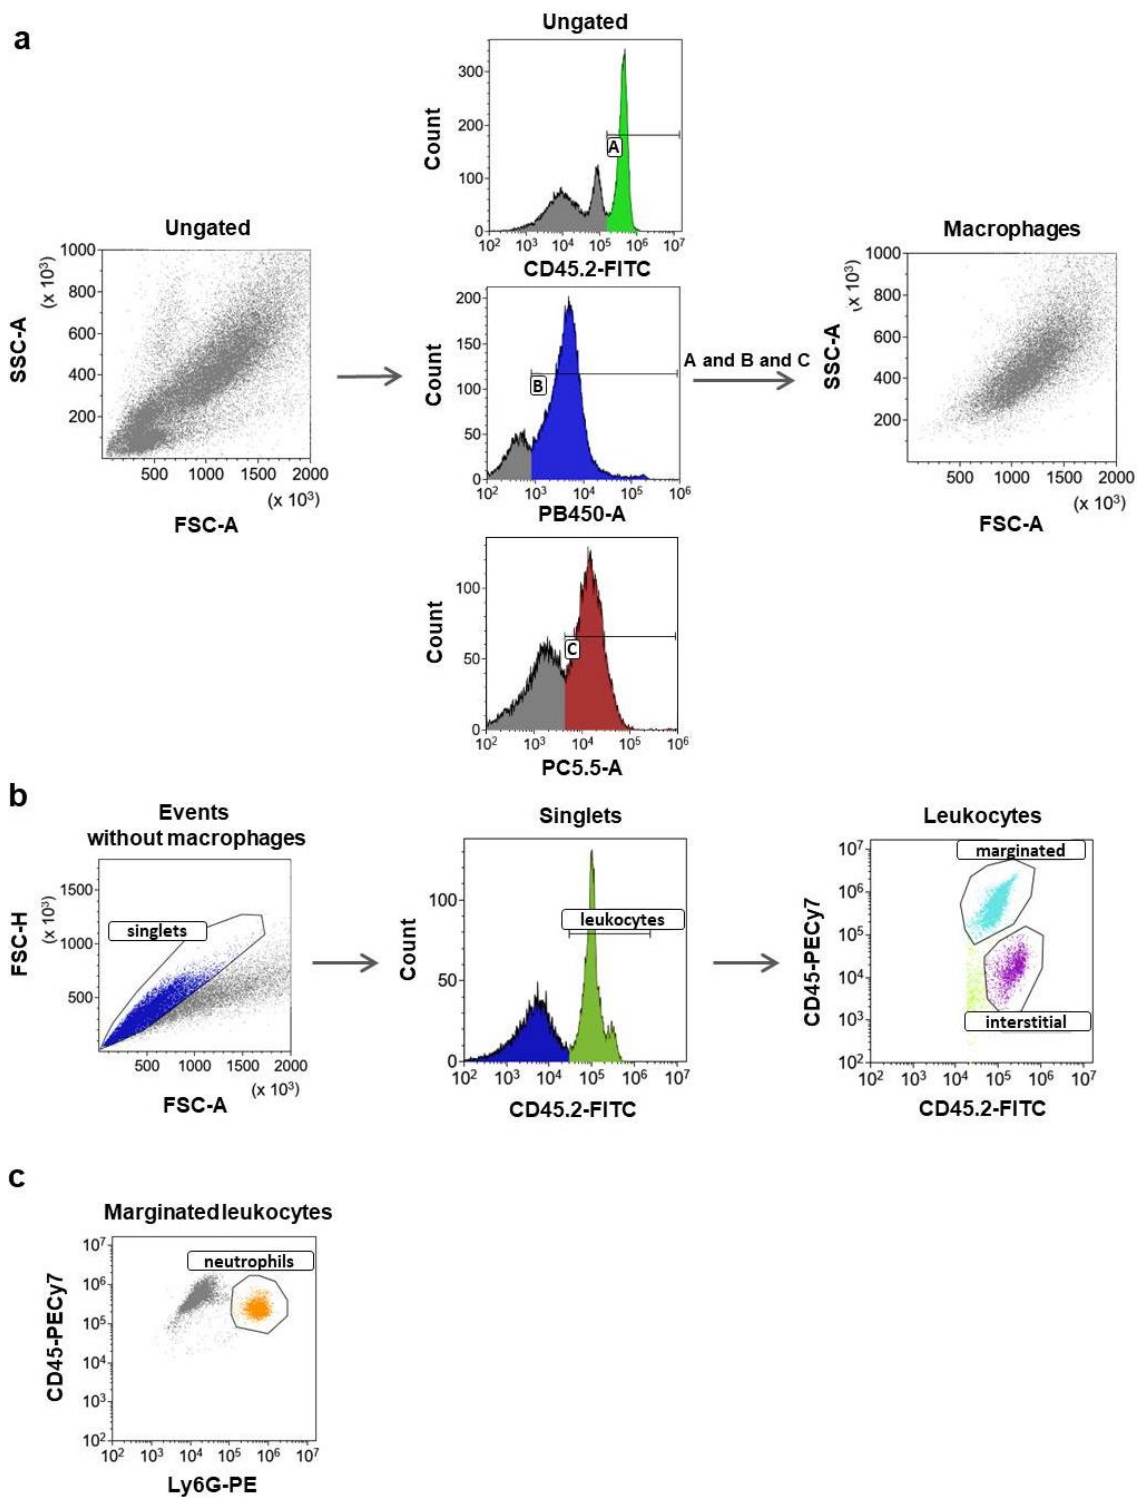

**Supplementary Figure 3. Flow cytometric analysis of the marginated and tissue leukocyte populations of the lung.** (A) Identification of tissue macrophages according to CD45-FITC positivity and their high autofluorescence measured in PB450 and PC5.5 channels. (B) Identification of the marginated (CD45-PECy7+, CD45.2-FITC+) and tissue leukocytes (CD45-PECy7-, CD45.2-FITC+) of the lung. (C) Identification of marginated neutrophils (Ly6G-PE+) of the lung.

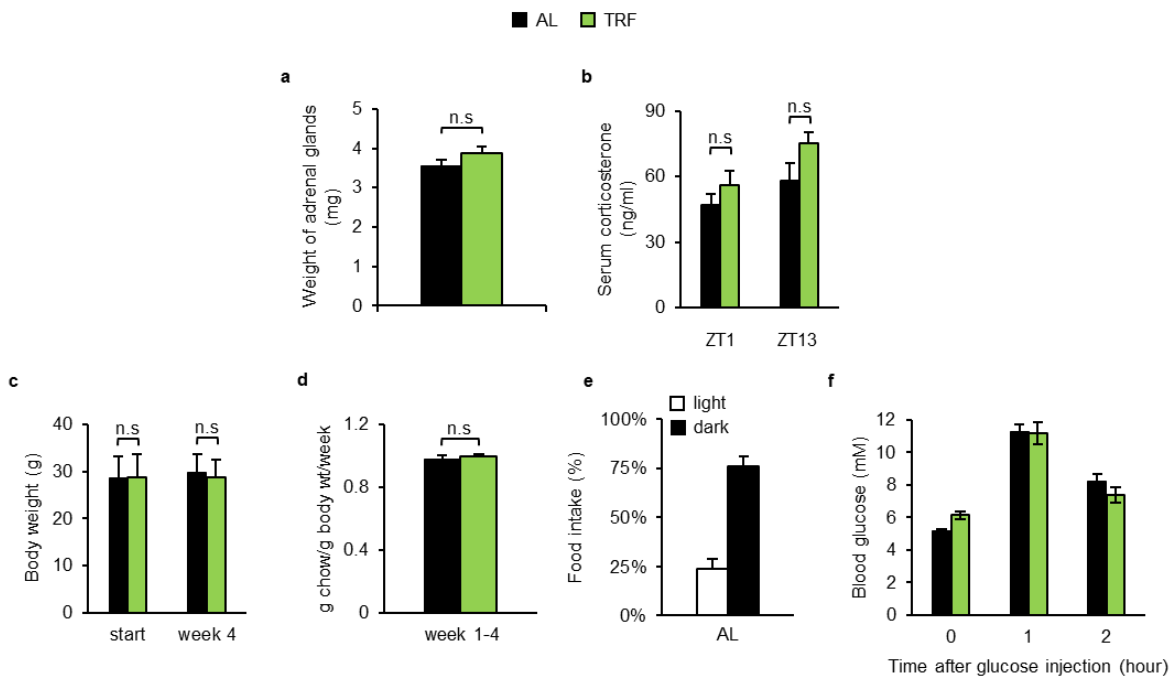

**Supplementary Figure 4. Adrenal mass, serum corticosterone levels, body weight, food intake and glucose tolerance of the experimental groups.** (A) Adrenal mass after 4-week time restricted feeding (mean + SD n=15 (AL), n=13 (TRF), two-sample t-test, n.s. p=0.154). (B) Serum corticosterone levels after 4-week time restricted feeding (mean + SEM n=11 (AL), n=11 (TRF), two-sample t-test, n.s. p=0.287 and p=0.091 for ZT1 and ZT13 respectively). (C) Body weight of the animals at the start and after 4 weeks of the feeding regimens (mean + SD, n=75 (AL), n=82 (TRF), two-sample t-test, n.s. p=0.871 and p=0.137 for start and week 4 respectively). (D) Average of the weekly food intake normalized to g body weight (mean + SEM, n=24 (AL), n=28 (TRF), two-sample t-test, n.s. p=0.571). (E) Food intake of the ad libitum fed animals in the light and dark phases of the day (mean + SD n=5 cages) (F) IPGTT measured in AL and TRF mice after 16 hours fasting. Average blood glucose levels after IPGTT in AL and TRF mice (mean ± SEM, n=7 (AL), n=9 (TRF), repeated measures ANOVA, time effect p<0.001, group effect p=0.986). ZT=Zeitgeber time, n.s.=not significant

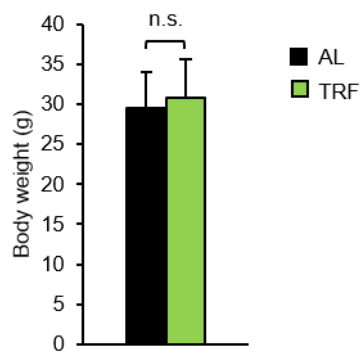

**Supplementary Figure 5. Body weight of the animals did not differ in arthritis experiments.** Body weight of the animals at the induction of K/BxN serum transfer arthritis (mean + SD, n=25 (AL), n=23 (TRF), two-sample t-test, n.s. p=0.348). n.s.=not significant

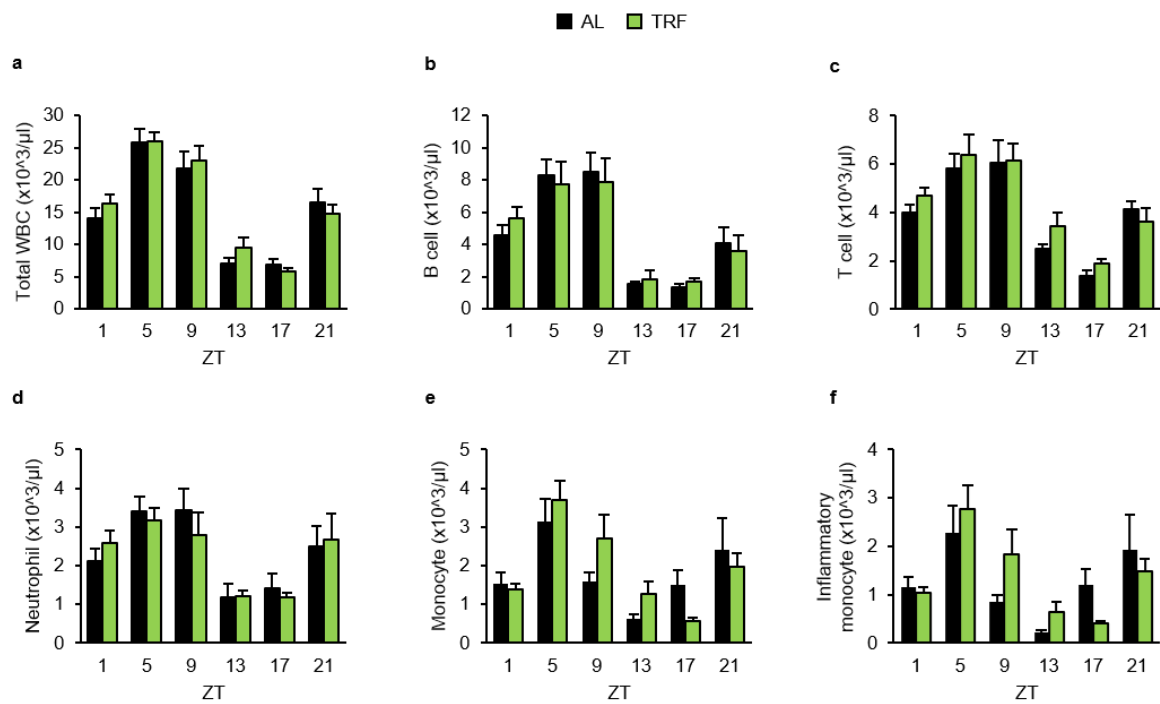

**Supplementary Figure 6. Peripheral leukocyte counts did not differ before conditioning the animals to different feeding regimens.** Total WBC (A), B-lymphocyte (B), T-lymphocyte (C), neutrophil (D), monocyte (E) and Ly6C<sup>high</sup> inflammatory monocyte (F) counts on the starting day of the 4-week feeding regimens (mean ± SEM, n=3-9 (AL), n=6-11 (TRF), two-way ANOVA, n.s.). ZT=Zeitgeber time, n.s.=not significant

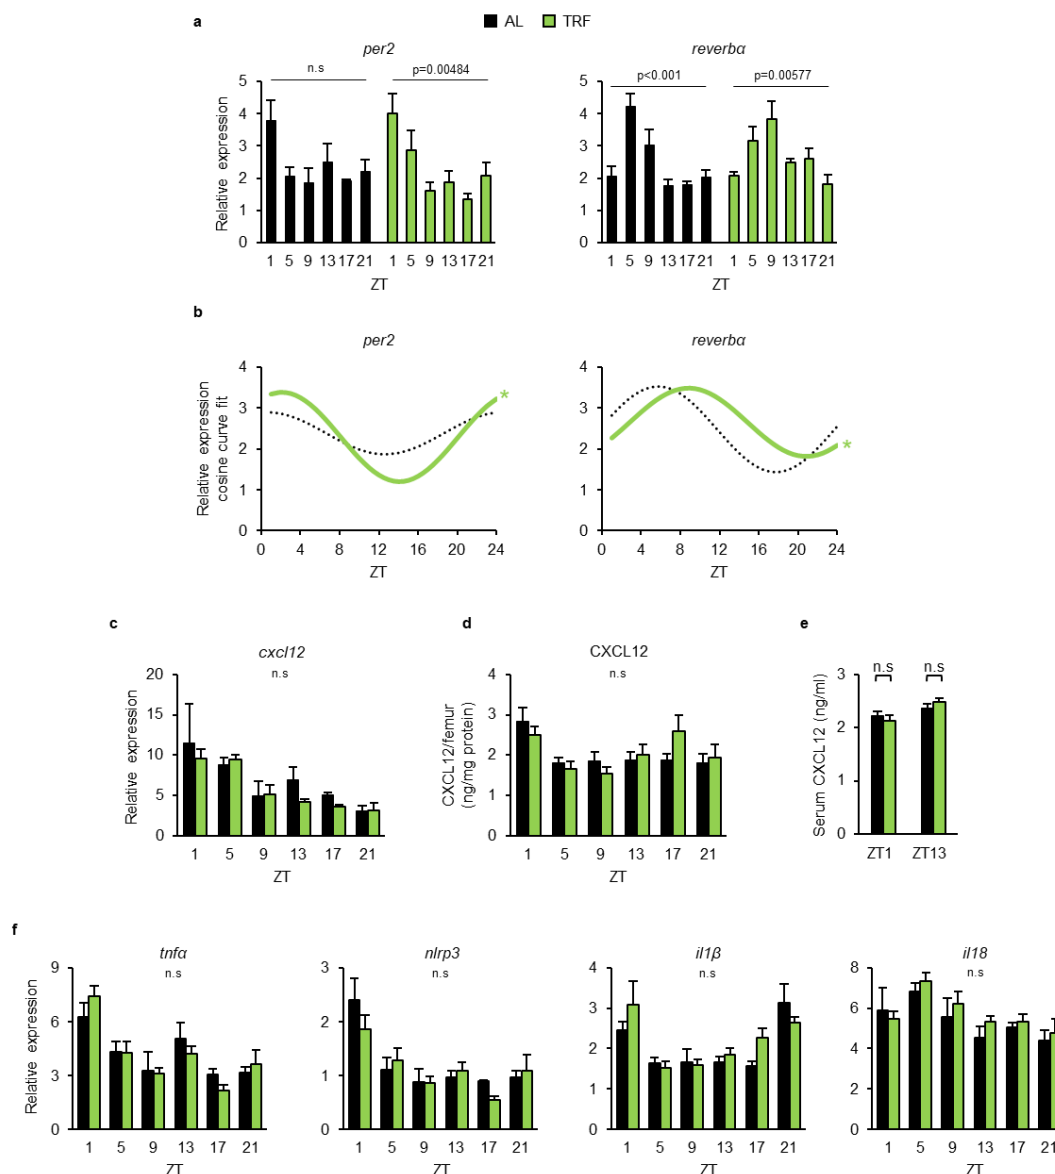

**Supplementary Figure 7. Time restricted feeding entrains the peripheral clock but does not modify the rhythm of CXCL12 and the inflammatory state of the bone marrow.** (A) Relative mRNA expression of *per2* and *reverba* in the course of the day (mean + SEM, n=3-8 (AL), n=6-9 (TRF), one-way ANOVA, \* indicates significant time effect). *Rplp0* was used as a reference. (B) Cosine curve fit to relative expression data showed in (A), \* and solid lines indicate significant, fixed 24-hour period cosine curve fit with cosinor analysis, whereas dashed lines show non-significant fit. Parameters of the fitted cosine curves are listed in Supplementary Table 6. (C) Relative mRNA expression of *cxcl12* (mean + SEM, n=3-8 (AL), n=6-9 (TRF), two-way ANOVA, time effect p=0.005, group effect n.s.). *Rplp0* was used as a reference. (D) Protein expression of CXCL12 in the bone marrow (mean ± SEM, n=5-10 (AL), n=7-11 (TRF), two-way ANOVA, time effect p=0.007, group effect n.s.). (E) Serum concentrations of CXCL12 (mean + SEM, n=4-8 (AL), n=3-11 (TRF), two-sample t-test, n.s.). (F) Relative mRNA expression of *tnfa*, *nlrp3*, *il1b* and *il18* in the course of day in bone marrow (mean + SEM, n=3-8 (AL) and n=6-9 (TRF), two-way ANOVA, group effect n.s.). *Rplp0* was used as a reference. ZT=Zeitgeber time, n.s.=not significant



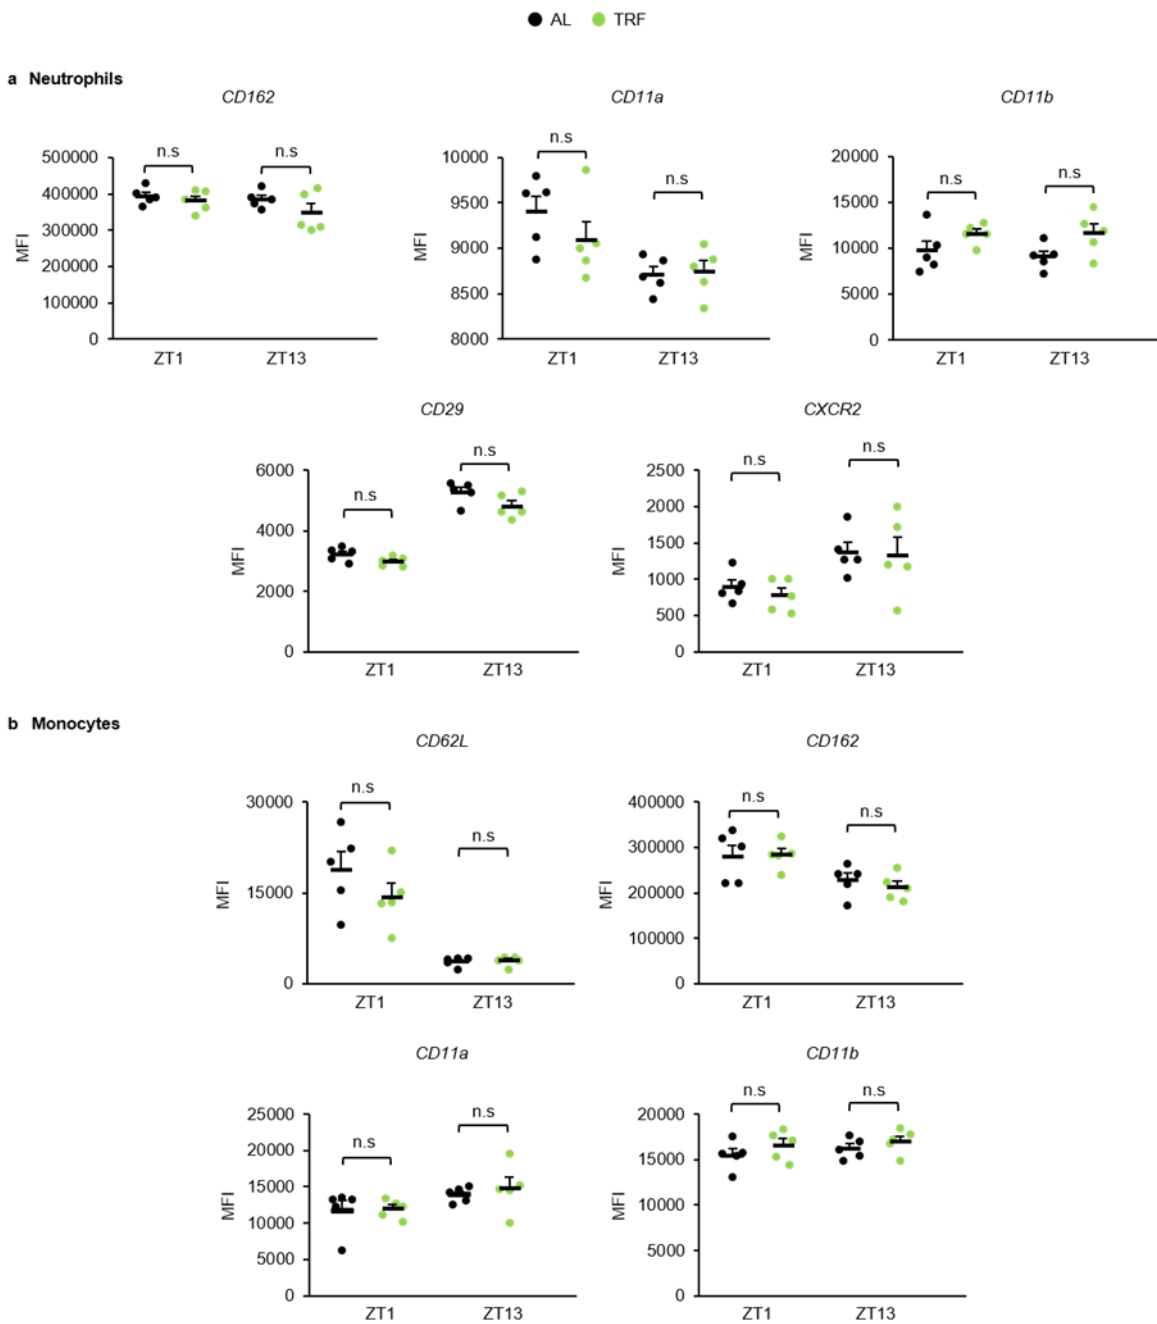

**Supplementary Figure 8. Expression of migratory factors of neutrophils and monocytes.** Selectin (CD62L), selectin ligand (CD162), integrin (CD11a, CD11b, CD29) and chemokine receptor (CXCR2) expression of neutrophils (A) and monocytes (B) at ZT1 and ZT13 (mean + SEM, n=5 (AL), n=5 (TRF), two-sample t-test, \*p<0.05). ZT=Zeitgeber time, n.s.=not significant

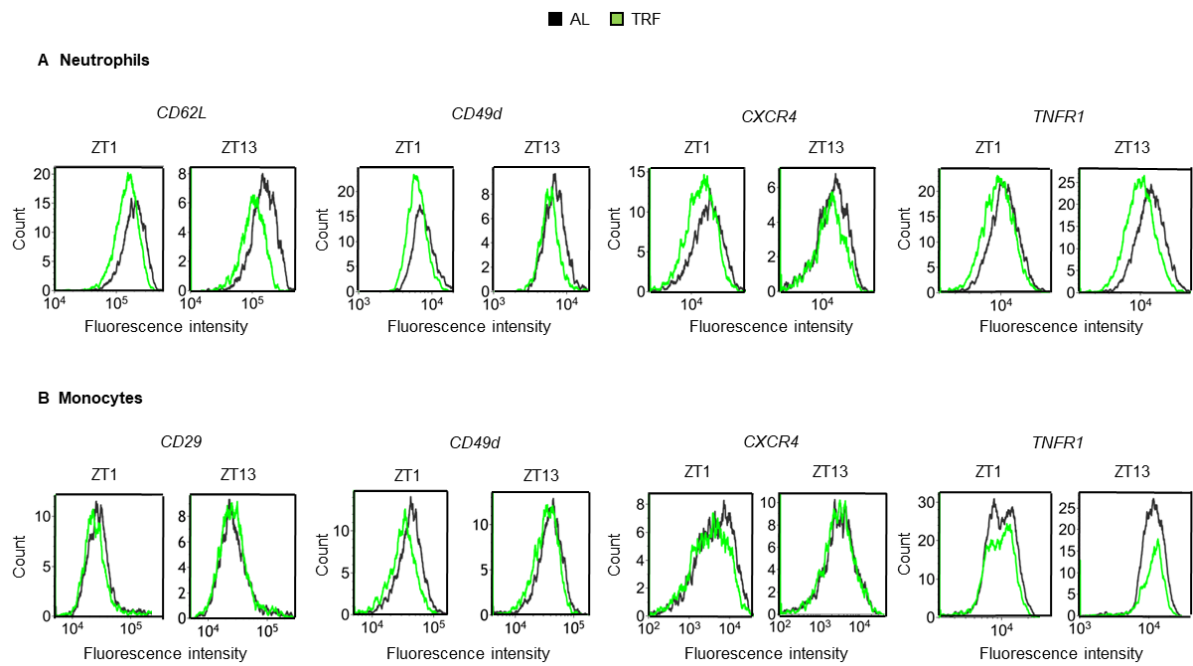

**Supplementary Figure 9. Histograms of fluorescence intensities presented in Figure 6. Selectin (CD62L), integrin (CD29, CD49d) and cytokine receptor (CXCR4, TNFR1) expression of neutrophils (A) and monocytes (B) at ZT1 and ZT13. ZT=Zeitgeber time**

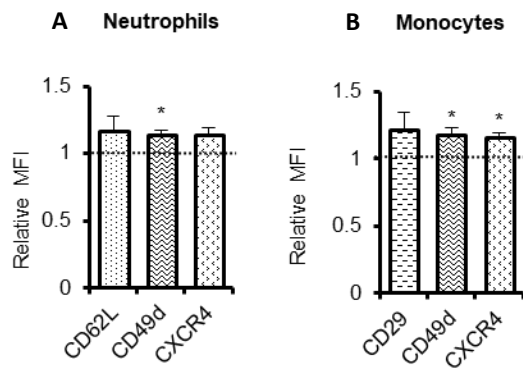

**Supplementary Figure 10. Expression of migratory factors of neutrophils and monocytes after leptin treatment.** Selectin (CD62L), integrin (CD29, CD49d) and chemokine receptor (CXCR4) expression of neutrophils (**A**) and monocytes (**B**) after leptin treatment compared to vehicle (mean + SEM, n=5, one-sample t-test, \*p<0.05).

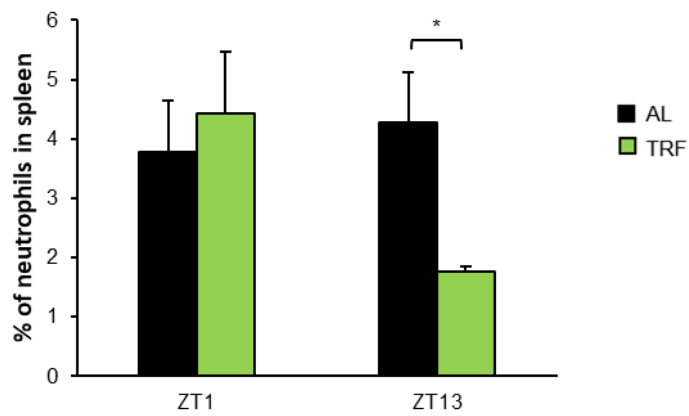

**Supplementary Figure 11. Effect of TRF on the abundance of neutrophils among spleen leukocytes.** Percentage of neutrophils among spleen leukocytes at ZT1 and ZT13 (mean + SEM,  $n=3-6$  (AL) and  $n=5-8$  (TRF), two-sample t-test,  $*p<0.05$ ). ZT=*Zeitgeber* time

**Supplementary Table 1.**

Primer and probe sequences for gene expression analysis.

| gene                             |         | sequence                                 |
|----------------------------------|---------|------------------------------------------|
| <i>rplp0</i>                     | forward | 5'-CTCGCTTTCTGGAGGGTGTGTC-3'             |
|                                  | reverse | 5'-AGTCTCCACAGACAATGCCA-3'               |
|                                  | probe   | 5'FAM-TGCCTCGGTGCCACACTCCA-TAMRA3'       |
| <i>per2</i>                      | forward | 5'-GCTTCCGCCCTGGAGTGT-3'                 |
|                                  | reverse | 5'-TCTCCTCCATGCACTCCTGAG-3'              |
|                                  | probe   | 5'FAM-CAGCGGCTTAGATTC-MGB3'              |
| <i>reverb<math>\alpha</math></i> | forward | 5'-GACCTTTCTCAGCACGACC-3'                |
|                                  | reverse | 5'-CATCACTGTCTGGTCCTTCAC-3'              |
|                                  | probe   | 5'FAM-CAAAGCGCACCATCAGCACCTC-TAMRA3'     |
| <i>cxcl12</i>                    | forward | 5'-CGCTCTGCATCAGTGACG-3'                 |
|                                  | reverse | 5'-TGAAGGGCACAGTTTGGAG -3'               |
|                                  | probe   | 5'FAM-CTTGACGTTGGCTCTGGCGATGT-TAMRA3'    |
| <i>tnf<math>\alpha</math></i>    | forward | 5'-CCCTCCAGAAAAGACACCATG-3'              |
|                                  | reverse | 5'-GCCACAAGCAGGAATGAGAAG -3'             |
|                                  | probe   | 5'FAM-CACAGAAAGCATGATCCGCGACG-TAMRA3'    |
| <i>il1<math>\beta</math></i>     | forward | 5'-TCCTGTGTAATGAAAGACGGC-3'              |
|                                  | reverse | 5'-ACTCCACTTTGCTCTTGACTTC-3'             |
|                                  | probe   | 5'FAM-TTGGGTATTGCTTGGGATCCACACTC-TAMRA3' |
| <i>il18</i>                      | forward | 5'-GCCTCAAACCTTCCAAATCAC-3'              |
|                                  | reverse | 5'-GTTGTCTGATTCAGGTCTCC-3'               |
|                                  | probe   | 5'FAM-TGCCATGTCAGAAGACTCTTGCGT-TAMRA3'   |
| <i>nlrp3</i>                     | forward | 5'-ATGGGTTTGCTGGGATATCTC-3'              |
|                                  | reverse | 5'-GCGTTCCTGTCCTTGATAGAG-3'              |
|                                  | probe   | 5'FAM-AGAACCTGCTTCTCACATGTCGTCTG-TAMRA3' |
| <i>leptin</i>                    | forward | 5'-AGCCTCACTCTACTCCACAG-3'               |
|                                  | reverse | 5'-CCTCTACATGATTCTTGGGAGC-3'             |
|                                  | probe   | 5'FAM-TCAGCATTTCAGGGCTAACATCCAAC-TAMRA3' |
| <i>adipsin</i>                   | forward | 5'-CCTGAACCCTACAAGCGATG-3'               |
|                                  | reverse | 5'-CAACGAGGCATTCTGGGATAG-3'              |
|                                  | probe   | 5'FAM-CCGGGTGAGGCACTACACTCTG-TAMRA3'     |

**Supplementary Table 2.**

Antibodies and staining reagents.

| Antibody                  | Clone         | Conjugate        | Catalog # |
|---------------------------|---------------|------------------|-----------|
| CD45                      | 30-F11        | FITC             | 11-0451   |
| CD45                      | 30-F11        | PE               | 12-0451   |
| CD45                      | 30-F11        | PECy7            | 25-0451   |
| CD45.2                    | 104           | FITC             | 11-0454   |
| Ly-6G                     | 1A8-Ly6g      | PE               | 12-9668   |
| Ly-6G                     | 1A8-Ly6g      | APC              | 17-9668   |
| CD62L                     | MEL-14        | PECy7            | 25-0621   |
| CD115                     | AFS98         | APC              | 17-1152   |
| CD11b                     | M1/70         | eFluor 450       | 48-0112   |
| CD11b                     | M1/70         | APC              | 561690    |
| Ly-6C                     | HK1.4         | APC-eFluor 780   | 47-5932   |
| CD3                       | 17A2          | FITC             | 11-0032   |
| CD19                      | eBio1D3 (1D3) | PECy7            | 25-0193   |
| CD162                     | 4RA10         | PE               | 12-1621   |
| CD11a                     | M17/4         | eFluor 450       | 48-0111   |
| CD49d                     | R1-2          | PerCP-eFluor 710 | 46-0492   |
| CD29                      | HMb1-1        | APC-eFluor 780   | 47-0291   |
| CXCR4                     | L276F12       | APC              | BZ-146507 |
| CXCR2                     | IL-8RB        | PerCP            | FAB2164C  |
| CD120a (TNFR1)            | 55R-286       | PE               | BZ-113003 |
| Live/Dead Fixable Far Red |               |                  | L34974    |

CXCR4 and CXCR2 antibodies were produced by Biolegend and R&D Systems, respectively, all other antibodies were manufactured by eBioscience. The LIVE/DEAD™ Fixable Far Red Dead Cell Stain Kit was manufactured by Life Technologies.

**Supplementary Table 3.**

Parameters of the fitted cosine curves shown in Figure 2B.

|                      | spleen weight |       |
|----------------------|---------------|-------|
|                      | AL            | TRF   |
| Mesor                | 70.64         | 60.67 |
| Amplitude            | 7.45          | 8.18  |
| Acrophase (ZT)       | 4.18          | 3.24  |
| Cosinor fit, p-value | 0.114         | 0.015 |

**Supplementary Table 4.**

Parameters of the fitted cosine curves shown in Figure 3B and D.

|                         | <i>per2</i> |       | <i>reverbA</i> |       | <i>leptin</i> |       | serum leptin |         |
|-------------------------|-------------|-------|----------------|-------|---------------|-------|--------------|---------|
|                         | AL          | TRF   | AL             | TRF   | AL            | TRF   | AL           | TRF     |
| Mesor                   | 13.35       | 13.63 | 22.05          | 18.61 | 25.40         | 18.28 | 6627.71      | 4291.4  |
| Amplitude               | 15.40       | 19.06 | 24.68          | 20.72 | 3.96          | 12.53 | 2495.47      | 3073.92 |
| Acrophase<br>(ZT)       | 14.23       | 13.84 | 8.57           | 9.45  | 16.97         | 17.66 | 21.96        | 19.79   |
| Cosinor fit,<br>p-value | 0.071       | 0.165 | 0.000          | 0.011 | 0.771         | 0.018 | 0.072        | 0.003   |



**Supplementary Table 5.**

Parameters of the fitted cosine curves shown in Figure 5.

|                              | Total WBC |       | B cell |       | T cell |       |
|------------------------------|-----------|-------|--------|-------|--------|-------|
|                              | AL        | TRF   | AL     | TRF   | AL     | TRF   |
| Mesor                        | 17.00     | 17.54 | 6.13   | 6.67  | 4.29   | 4.35  |
| Amplitude                    | 8.59      | 9.99  | 3.99   | 4.26  | 1.60   | 1.99  |
| Acrophase (ZT)               | 5.22      | 4.57  | 5.02   | 4.49  | 5.09   | 4.97  |
| Cosinor fit,<br>p-value      | 0.042     | 0.009 | 0.053  | 0.078 | 0.160  | 0.022 |
| Increase in<br>amplitude (%) |           | 16    |        | 7     |        | 24    |

  

|                              | Neutrophil |       | Monocyte |       | Ly6C <sup>high</sup> Monocyte |       |
|------------------------------|------------|-------|----------|-------|-------------------------------|-------|
|                              | AL         | TRF   | AL       | TRF   | AL                            | TRF   |
| Mesor                        | 2.54       | 2.77  | 1.65     | 1.51  | 1.17                          | 1.01  |
| Amplitude                    | 1.01       | 1.58  | 0.51     | 0.98  | 0.38                          | 0.79  |
| Acrophase (ZT)               | 4.60       | 2.50  | 5.84     | 5.70  | 4.59                          | 4.98  |
| Cosinor fit,<br>p-value      | 0.004      | 0.016 | 0.120    | 0.000 | 0.17                          | 0.001 |
| Increase in<br>amplitude (%) |            | 56    |          | 93    |                               | 101   |

**Supplementary Table 6.**

Parameters of the fitted cosine curves shown in Supplementary Figure 7B.

|                      | <i>per2</i> |       | <i>reverta</i> |       |
|----------------------|-------------|-------|----------------|-------|
|                      | AL          | TRF   | AL             | TRF   |
| Mesor                | 2.38        | 2.29  | 2.48           | 2.65  |
| Amplitude            | 0.51        | 1.09  | 1.05           | 0.83  |
| Acrophase (ZT)       | 0.62        | 2.09  | 5.74           | 8.84  |
| Cosinor fit, p-value | 0.408       | 0.037 | 0.050          | 0.024 |

**Supplementary Table 7.**

Parameters of the cosine curves fitted on data shown in Supplementary Figure 7C, D, F.

|                         | <i>cxcl12</i> |       | CXCL12                       |       | <i>tnf<math>\alpha</math></i> |       |
|-------------------------|---------------|-------|------------------------------|-------|-------------------------------|-------|
|                         | AL            | TRF   | AL                           | TRF   | AL                            | TRF   |
| Mesor                   | 6.75          | 5.85  | 2.02                         | 2.04  | 4.18                          | 4.13  |
| Amplitude               | 2.45          | 3.32  | 0.30                         | 0.39  | 0.71                          | 1.59  |
| Acrophase (ZT)          | 3.71          | 3.85  | 0.91                         | 19.74 | 3.31                          | 2.1   |
| Cosinor fit,<br>p-value | 0.289         | 0.023 | 0.370                        | 0.186 | 0.607                         | 0.206 |
|                         | <i>nlrp3</i>  |       | <i>il1<math>\beta</math></i> |       | <i>il18</i>                   |       |
|                         | AL            | TRF   | AL                           | TRF   | AL                            | TRF   |
| Mesor                   | 1.20          | 1.12  | 2.02                         | 2.16  | 5.38                          | 5.75  |
| Amplitude               | 0.53          | 0.44  | 0.65                         | 0.70  | 1.02                          | 1.01  |
| Acrophase (ZT)          | 1.26          | 2.29  | 22.46                        | 21.77 | 4.81                          | 6.45  |
| Cosinor fit,<br>p-value | 0.197         | 0.098 | 0.081                        | 0.030 | 0.033                         | 0.035 |
